# Supplementary material for: Platinum on 2-aminoethanethiol functionalized MIL-101 as a catalyst for alkene hydrosilylation
Source: Royal Society of Chemistry journal article supplement (doi:10.1039/c9ra01408j), 2019-01-01

## Electronic Supplementary information

### Platinum on 2-Aminoethanethiol Functionalized MIL-101 as a Catalyst for Alkenes Hydrosilylation

Zhikai Xie,<sup>a</sup> Wenbin Hu,<sup>\*a</sup> Xugang Shu,<sup>\*a</sup> Xinhua Zhou,<sup>a</sup> Xiuying Chen,<sup>a</sup> and Weiwen Chen,<sup>a</sup>

<sup>a</sup>College of Chemistry and Chemical Engineering, Zhongkai University of Agriculture and Engineering, Guangzhou 510225, China. E-mail: wbhu2000@163.com; xgshu@21cn.com; Tel: +86 020 89003208

\*E-mail address:wbhu2000@163.com; xgshu@21cn.com;

#### Table of contents

S1. 1.5%Pt<sup>δ+</sup>/AET-MIL-101 (a); Recovered 1.5%Pt<sup>δ+</sup>/AET-MIL-101 catalyst (b)

S2. XPS spectra of the recovered 1.5%Pt<sup>δ+</sup>/AET-MIL-101

S3. <sup>1</sup>H NMR data of the synthesized compounds

S4. <sup>1</sup>H NMR spectra of the synthesized compounds

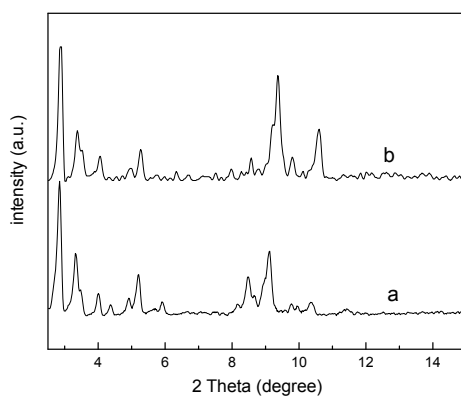

S1. 1.5%Pt<sup>δ+</sup>/AET-MIL-101 (a); Recovered 1.5%Pt<sup>δ+</sup>/AET-MIL-101 catalyst (b)

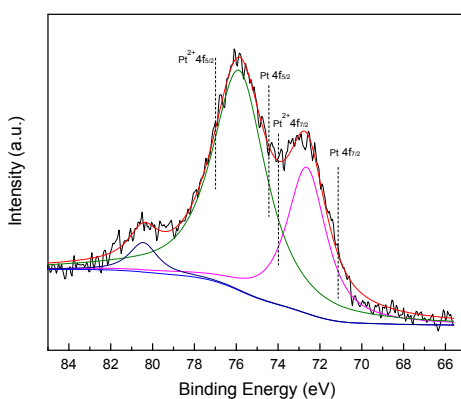

S2. XPS spectra of the recovered 1.5%Pt<sup>δ+</sup>/AET-MIL-101

S3 <sup>1</sup>H NMR data of the synthesized compounds

(i) Heptamethyltrisiloxane

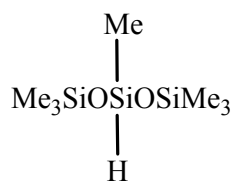

<sup>1</sup>H NMR (400 MHz, CDCl<sub>3</sub>, ppm) δ 4.36 (s, 1H), 0.13-0.07 (m, 21H).

(ii) Allyl alcohol polyether and heptamethyltrisiloxane reaction product (Table 3 entry 1)

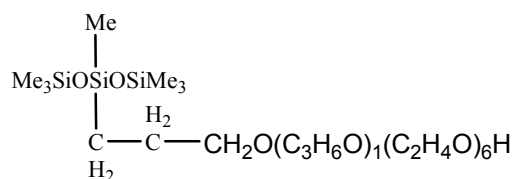

<sup>1</sup>H NMR (400 MHz, CDCl<sub>3</sub>, ppm) δ 3.76-3.38 (m, 37H), 3.07-2.95 (m, 1H), 2.71 (s, 1H), 1.59-1.52 (m, 2H), 0.4 (s, 1H), 0.18-0.04 (m, 26H).

(iii) Allyl alcohol polyether and heptamethyltrisiloxane reaction product (Table 3 entry 2)

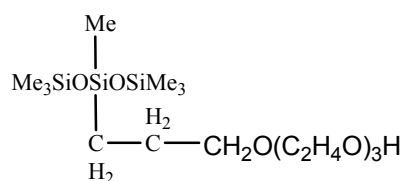

<sup>1</sup>H NMR (400 MHz, CDCl<sub>3</sub>, ppm) δ 3.71-3.38 (s, 18H), 2.60 (s, 1H), 1.6 (s, 2H), 0.43 (s, 1H), 0.11-0.07 (m, 21H).

(iv) 1-Dodecene and heptamethyltrisiloxane reaction product (Table 3 entry 3)

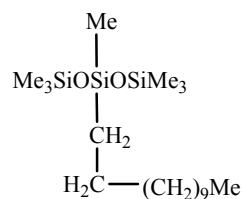

<sup>1</sup>H NMR (400 MHz, CDCl<sub>3</sub>, ppm) δ 1.63-1.20 (m, 5H), 0.87 (s, 1H), 0.11-0.08 (m, 7H).

(v) 1-Tetradecene heptamethyltrisiloxane reaction product (Table 3 entry 4)

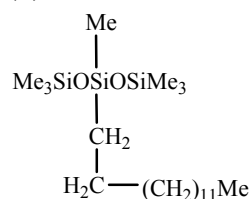

<sup>1</sup>H NMR (400 MHz, CDCl<sub>3</sub>, ppm) δ 1.30-1.25 (m, 6H), 0.87 (s, 1H), 0.13-0.05 (m, 7H).

(vi) Styrene heptamethyltrisiloxane reaction product (Table 3 entry 4)

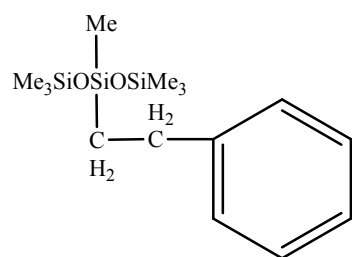

$^1\text{H}$  NMR (400 MHz,  $\text{CDCl}_3$ , ppm)  $\delta$  2.66-2.63 (m, 1H), 0.85 (s, 1H), 0.13-0.01(m, 18H).

S4  $^1\text{H}$  NMR spectra of the synthesized compounds

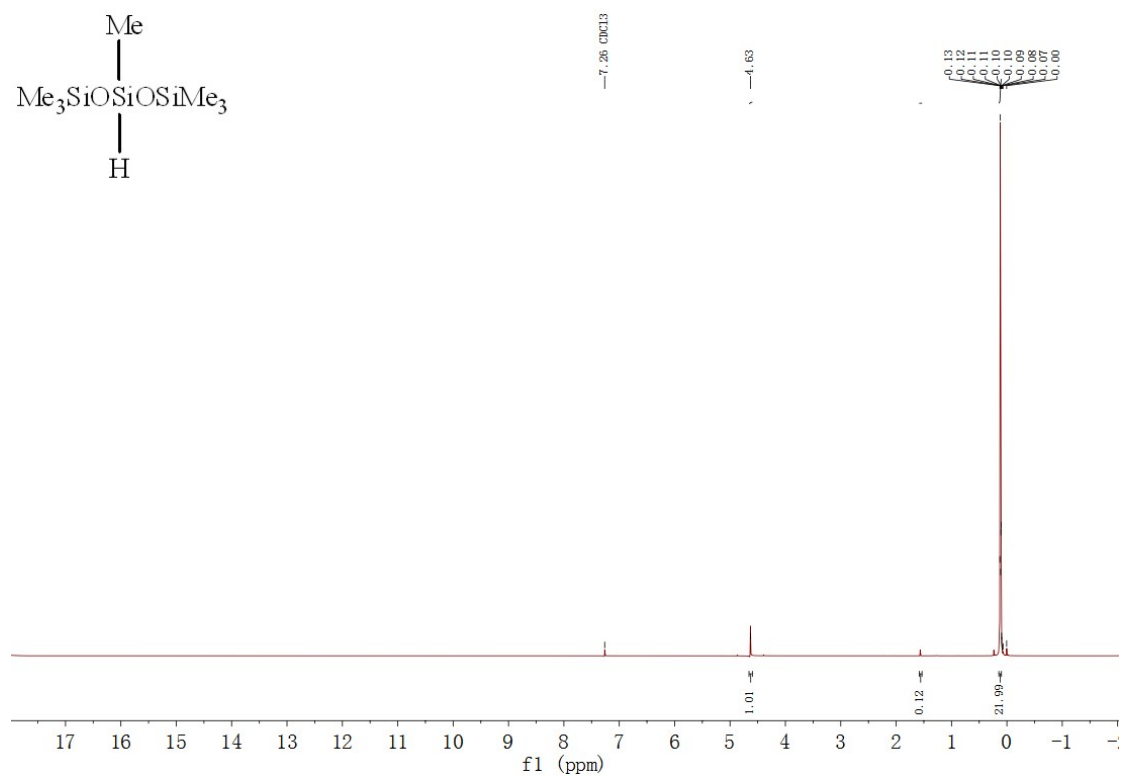

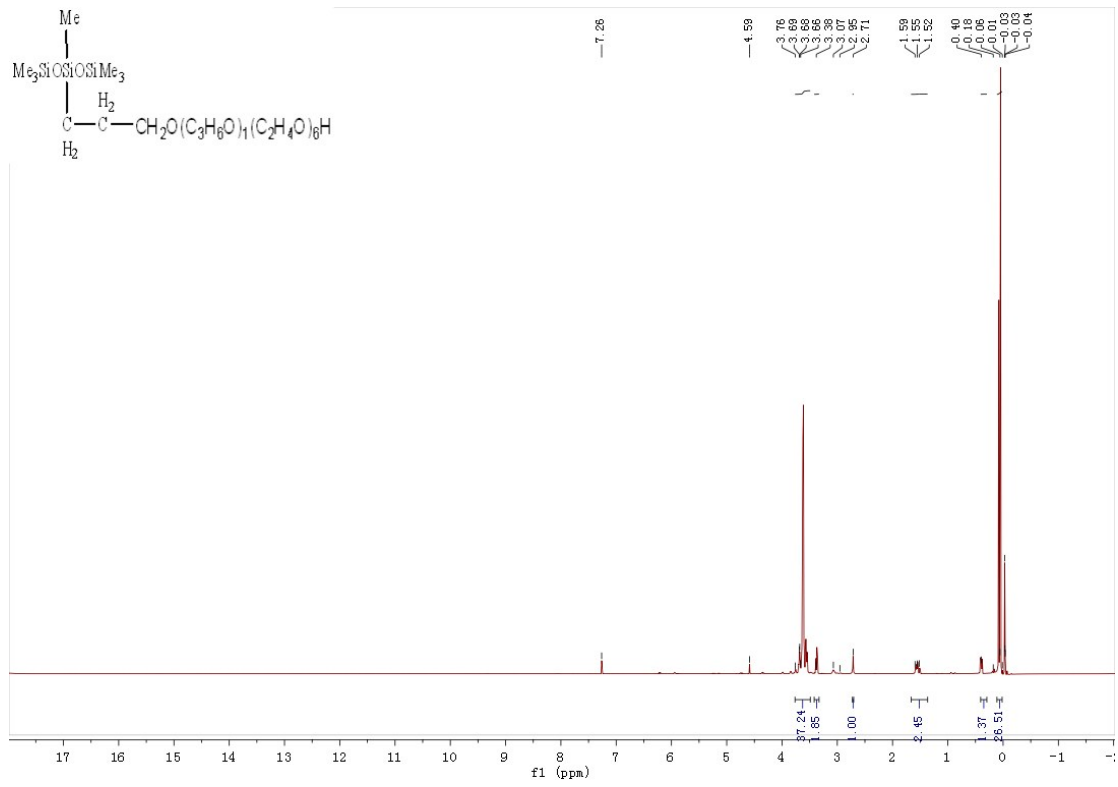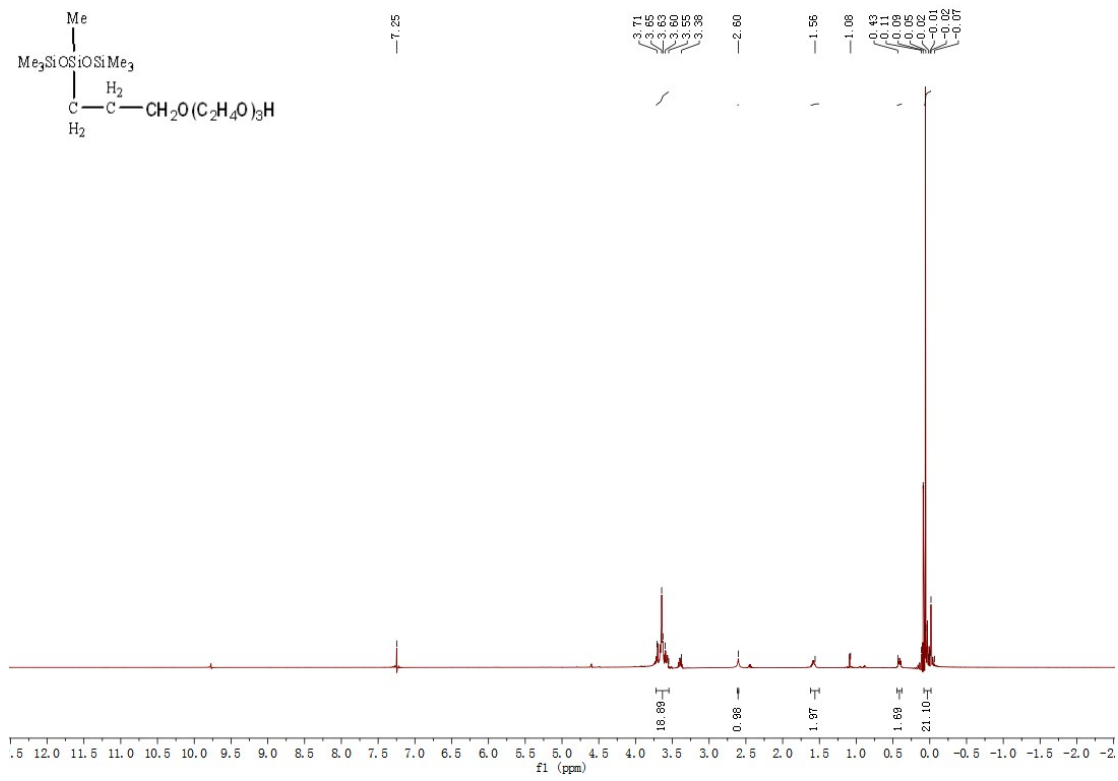

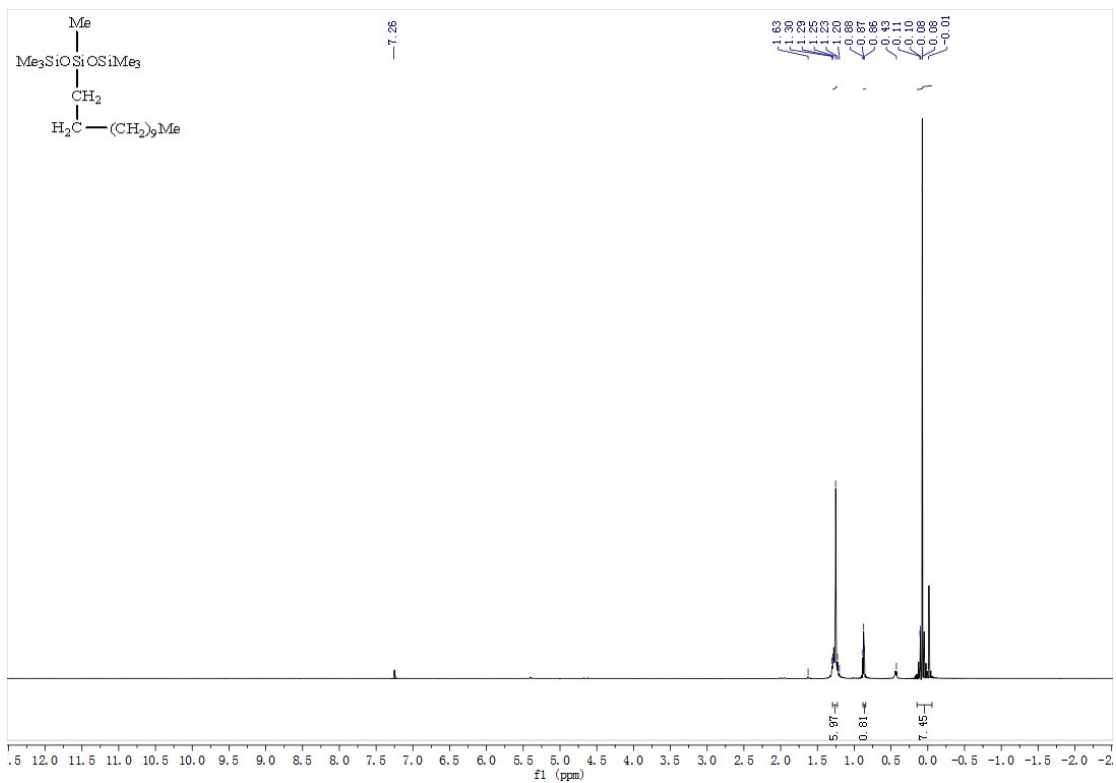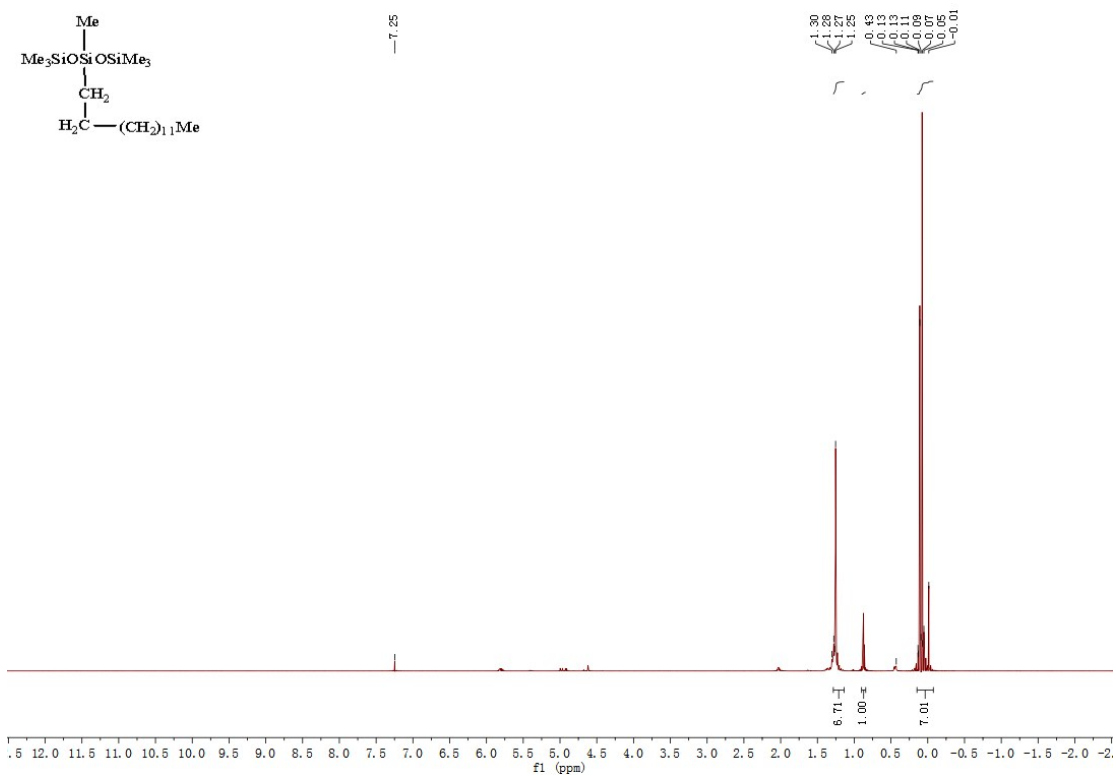

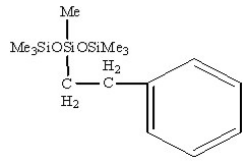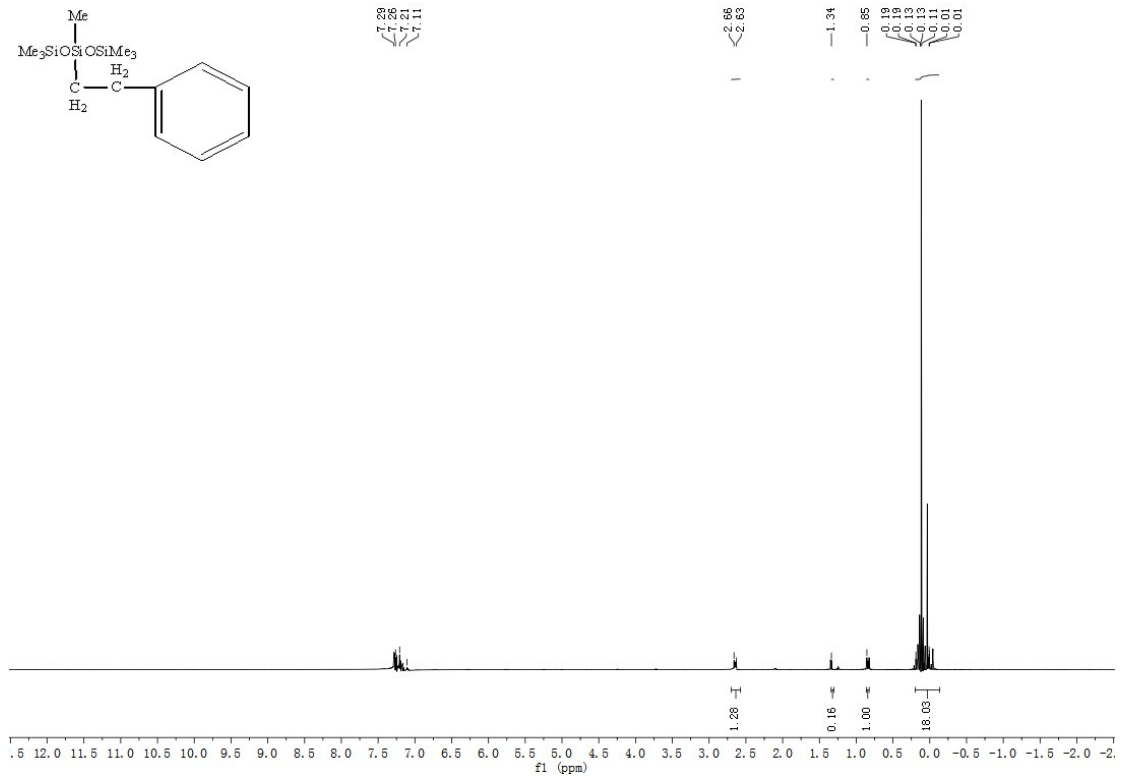

Supplement: c9ra01408j1.pdf [file c9ra01408j1.pdf]
